# Supplementary material for: Evaluation of The Pathogenic Potential of Insecticidal Serratia marcescens Strains to Humans
Source: PubMed Central journal article supplement — Pol J Microbiol. 2019 May 31;68(2):185–91. doi: 10.33073/pjm-2019-018 (PMC7260640; doi:10.33073/pjm-2019-018), 2019-05-31
Supplement: pjm-68-2-185_Supplementary.pdf [file pjm-68-2-185_Supplementary.pdf]

Supplementary materials for the article:

**Konecka E. et al.** Evaluation of The Pathogenic Potential of Insecticidal *Serratia marcescens* Strains to Humans.

Pol J Microbiol. 2019. Article in Press.

Table SI

Production of siderophores of *S. marcescens* strains isolated from insects.

| Isolate | Cross-feeding assay              |                           |                            |                                  |
|---------|----------------------------------|---------------------------|----------------------------|----------------------------------|
|         | <i>S. typhimurium</i><br>TA 2700 | <i>E. coli</i> LG<br>1522 | <i>M. organii</i><br>SBK 3 | <i>Y. enterocolitica</i><br>5030 |
| MPU Si1 | +                                | -                         | -                          | -                                |
| MPU Si2 | +                                | -                         | -                          | -                                |
| MPU Si3 | +                                | -                         | -                          | -                                |
| MPU Si4 | +                                | -                         | -                          | -                                |
| MPU Si5 | +                                | -                         | -                          | -                                |
| MPU Si6 | +                                | -                         | -                          | -                                |
| MPU Si7 | +                                | -                         | -                          | -                                |
| MPU Si8 | +                                | -                         | -                          | -                                |

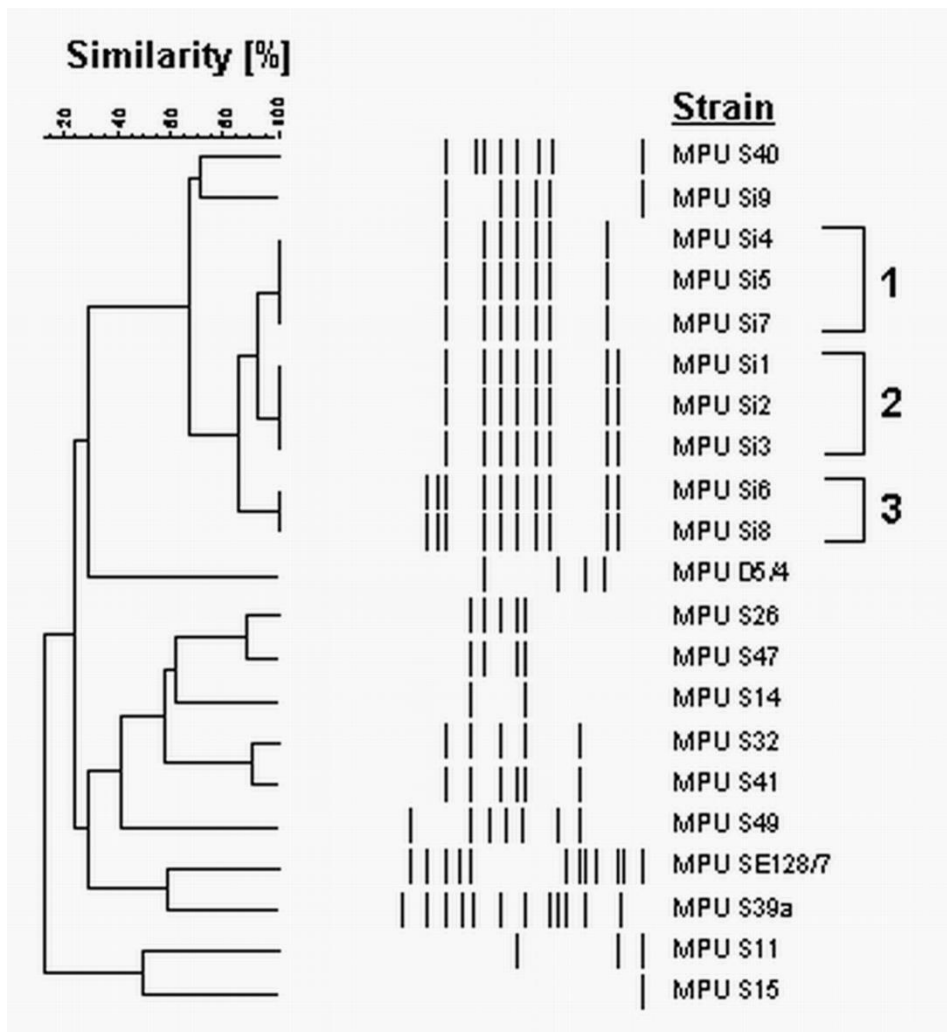

Fig. S1. Dendrogram (Dice/UPGMA) showing the similarity of DNA patterns of *Serratia* spp. strains obtained by the REP-PCR method.
